# Supplementary material for: Towards a hygroscopic growth calibration for low-cost PM 2.5 sensors
Source: Copernicus journal article supplement (doi:10.5194/amt-17-1051-2024), 2024-02-13
Supplement: Supplementary file 1 [file amt-17-1051-2024-supplement.pdf]

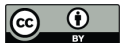

*Supplement of*

## **Towards a hygroscopic growth calibration for low-cost PM<sub>2.5</sub> sensors**

**Milan Y. Patel et al.**

*Correspondence to:* Ronald C. Cohen (rccohen@berkeley.edu)

The copyright of individual parts of the supplement might differ from the article licence.

**Table S1.** Summary statistics for the datasets from the Laney and LA sites for Plantower PM<sub>2.5</sub> measurements (PM PM<sub>2.5</sub>, in µg/m<sup>3</sup>), BME relative humidity measurements (RH, %), and EPA AQS PM<sub>2.5</sub> measurements (AQS PM<sub>2.5</sub>, in µg/m<sup>3</sup>). Cumulative frequency distributions are shown in Figure S8

| Statistic    | Laney                |       |                       | LA                   |       |                       |
|--------------|----------------------|-------|-----------------------|----------------------|-------|-----------------------|
|              | PT PM <sub>2.5</sub> | RH    | AQS PM <sub>2.5</sub> | PT PM <sub>2.5</sub> | RH    | AQS PM <sub>2.5</sub> |
| <b>count</b> | 17024                | 17024 | 17024                 | 12701                | 12701 | 12701                 |
| <b>mean</b>  | 9.74                 | 51.83 | 9.11                  | 12.14                | 46.89 | 13.41                 |
| <b>std</b>   | 10.58                | 18.79 | 6.34                  | 9.86                 | 22.88 | 8.39                  |
| <b>min</b>   | 0.00                 | 2.48  | -5.0                  | 0                    | 1.22  | -3.0                  |
| <b>25%</b>   | 2.71                 | 34.94 | 5.0                   | 5.14                 | 27.29 | 8.2                   |
| <b>50%</b>   | 6.13                 | 55.41 | 8.0                   | 9.67                 | 46.23 | 12.0                  |
| <b>75%</b>   | 11.97                | 67.68 | 12.0                  | 16.15                | 67.84 | 17.0                  |
| <b>max</b>   | 73.52                | 100   | 60.0                  | 144.51               | 100   | 265.3                 |

**Table S2.** Sinusoidal fitting parameters for  $\kappa$ ,  $m$ , and the Sulfate and EC fractions at the Laney Site as shown in Figure 1. The sine wave takes the form  $y = a * \sin\left(\frac{2\pi}{365} * (x - \delta)\right) + b$  where  $x$  is the day of the year and the phase shift  $\delta$  has units of days. The goodness of fit is given by  $r$ , the Pearson Correlation between the true values and the sine wave fit.

| <b>y</b>         | <b>a</b> | <b>b</b> | <b><math>\delta</math></b> | <b>r</b> |
|------------------|----------|----------|----------------------------|----------|
| $\kappa$ (2021)  | 0.286    | 0.498    | 53.3                       | 0.73     |
| $\kappa$ (2022)  | 0.242    | 0.366    | 72.8                       | 0.86     |
| $m$ (2021)       | 0.998    | 1.668    | 53.2                       | 0.85     |
| $m$ (2022)       | 0.745    | 1.429    | 73.6                       | 0.89     |
| Sulfate Fraction | 0.046    | 0.091    | 94.0                       | 0.63     |
| EC Fraction      | 0.046    | 0.071    | 265.8                      | 0.74     |

**Table S3.** Monthly performance statistics for the sensor at Laney, relative to the co-located EPA AQS site, before and after the calibration was applied ( $r$ : Pearson Correlation Coefficient, MFB: Mean Fractional Bias, NRMSE: Normalized Root-Mean-Square Error).

| Month    | Before Calibration |            |              | After Calibration |            |              |
|----------|--------------------|------------|--------------|-------------------|------------|--------------|
|          | <b>r</b>           | <b>MFB</b> | <b>NRMSE</b> | <b>r</b>          | <b>MFB</b> | <b>NRMSE</b> |
| Jan 2021 | 0.818              | 0.455      | 0.918        | 0.842             | -0.021     | 0.43         |
| Feb 2021 | 0.740              | -0.023     | 0.666        | 0.808             | -0.101     | 0.529        |
| Mar 2021 | 0.711              | -0.305     | 0.558        | 0.789             | -0.152     | 0.461        |
| Apr 2021 | 0.666              | -0.335     | 0.486        | 0.768             | -0.087     | 0.343        |

|          |       |        |       |       |        |       |
|----------|-------|--------|-------|-------|--------|-------|
| May 2021 | 0.611 | -0.406 | 0.553 | 0.755 | -0.145 | 0.365 |
| Jun 2021 | 0.728 | -0.433 | 0.702 | 0.84  | -0.205 | 0.479 |
| Jul 2021 | 0.564 | -0.154 | 0.54  | 0.714 | 0.035  | 0.452 |
| Aug 2021 | 0.825 | 0.134  | 0.47  | 0.863 | 0.203  | 0.519 |
| Sep 2021 | 0.782 | 0.107  | 0.606 | 0.836 | -0.021 | 0.543 |
| Oct 2021 | 0.727 | -0.358 | 0.581 | 0.815 | -0.575 | 0.684 |
| Nov 2021 | 0.862 | 0.809  | 1.051 | 0.914 | -0.1   | 0.263 |
| Dec 2021 | 0.902 | 0.971  | 1.563 | 0.914 | -0.004 | 0.425 |
| Jan 2022 | 0.886 | 0.925  | 1.157 | 0.924 | 0.202  | 0.363 |
| Feb 2022 | 0.862 | 0.446  | 0.896 | 0.896 | 0.187  | 0.555 |
| Mar 2022 | 0.622 | -0.2   | 0.57  | 0.726 | -0.272 | 0.491 |
| Apr 2022 | 0.647 | -0.325 | 0.549 | 0.731 | -0.201 | 0.459 |
| May 2022 | 0.721 | -0.406 | 0.577 | 0.808 | -0.208 | 0.427 |
| Jun 2022 | 0.674 | -0.345 | 0.537 | 0.77  | -0.127 | 0.431 |
| Jul 2022 | 0.716 | -0.263 | 0.57  | 0.783 | -0.112 | 0.5   |
| Aug 2022 | 0.741 | -0.109 | 0.533 | 0.794 | -0.015 | 0.517 |
| Sep 2022 | 0.570 | -0.201 | 0.515 | 0.705 | -0.211 | 0.453 |
| Oct 2022 | 0.728 | 0.123  | 0.556 | 0.764 | -0.164 | 0.417 |
| Nov 2022 | 0.870 | 0.181  | 0.627 | 0.901 | -0.27  | 0.412 |
| Dec 2022 | 0.916 | 0.391  | 0.918 | 0.934 | -0.253 | 0.384 |

**Table S4.** Sinusoidal fitting parameters for  $\kappa$ ,  $m$ , and the Sulfate and EC fractions at the LA Site as shown in Figure 6. The sine wave takes the form  $y = a * \sin\left(\frac{2\pi}{365} * (x - \delta)\right) + b$  where  $x$  is the day of the year and the phase shift  $\delta$  has units of days. The goodness of fit is given by  $r$ , the Pearson Correlation between the true values and the sine wave fit.

| <b>y</b>         | <b>a</b> | <b>b</b> | <b><math>\delta</math></b> | <b>r</b> |
|------------------|----------|----------|----------------------------|----------|
| $\kappa$         | 0.057    | 0.248    | 34.9                       | 0.36     |
| $m$              | 0.211    | 1.307    | 70.0                       | 0.65     |
| Sulfate Fraction | 0.072    | 0.115    | 100.5                      | 0.77     |
| EC Fraction      | 0.042    | 0.086    | 267.9                      | 0.64     |

**Table S5.** Performance statistics for the sensor in LA relative to its nearest EPA AQS site with different calibration schemes applied ( $R^2$ : Coefficient of Determination, RMSE: Root-Mean-Square Error)

| <b>Calibration Scheme</b> | <b><math>R^2</math></b> | <b>RMSE (<math>\mu\text{g}/\text{m}^3</math>)</b> |
|---------------------------|-------------------------|---------------------------------------------------|
|---------------------------|-------------------------|---------------------------------------------------|

|                          |       |      |
|--------------------------|-------|------|
| No Calibration           | 0.312 | 6.96 |
| National EPA Calibration | 0.116 | 7.89 |
| Seasonal RH Calibration  | 0.472 | 6.09 |

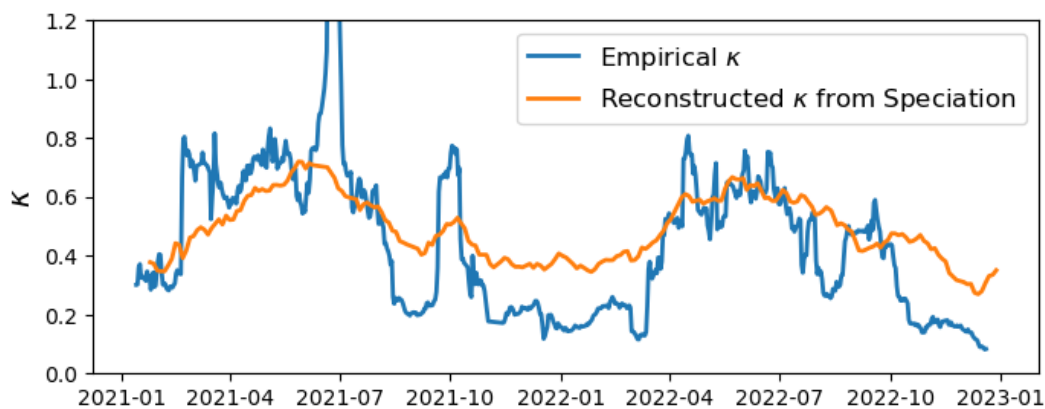

**Figure S1.** Empirically calculated  $\kappa$  for the Laney site (Table 1), as shown in Figure 1a, alongside  $\kappa$  reconstructed from particle speciation data, displayed as a 4-week rolling average. Note the speciation data is not collocated with the  $PM_{2.5}$  measurements. An organic matter/organic carbon ratio of 1.6 was used to assign the organic matter fraction of the particle.

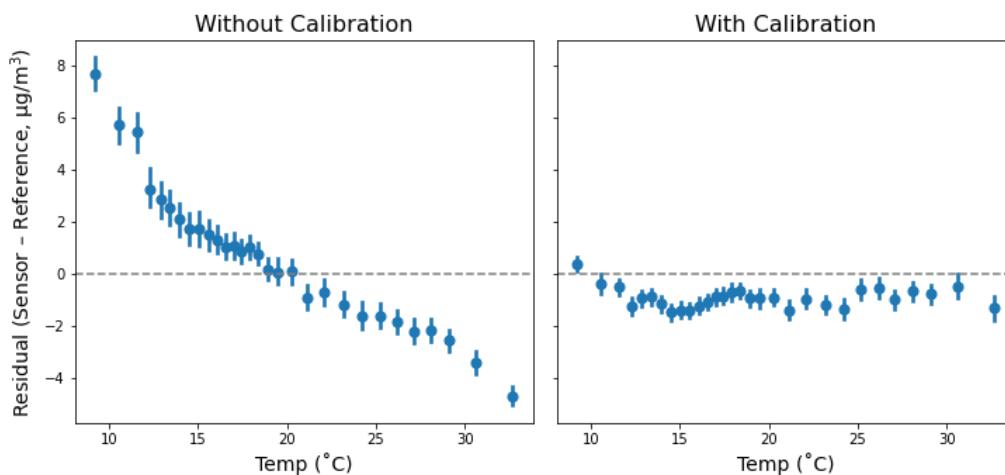

**Figure S2.** Measurement residuals (Sensor output – EPA AQS values) for Laney data without and with the seasonal RH dependence calibration, binned into 30 temperature bins.

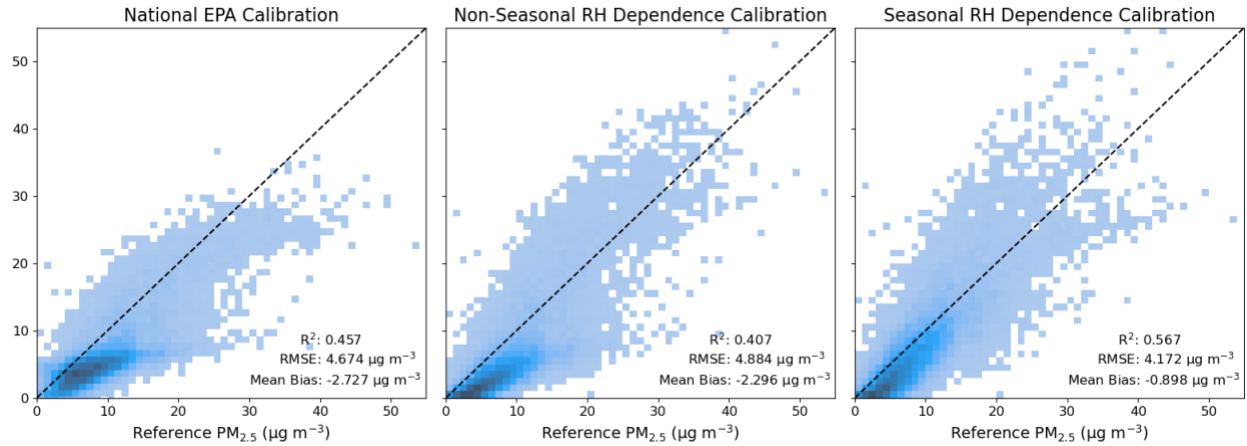

**Figure S3.** Sensor predicted  $\text{PM}_{2.5}$  values versus EPA reference values for Laney site from 2021–2022 with different correction algorithms. The non-seasonal RH dependence calibration uses a constant optimized  $\kappa$  and  $m$  value ( $\kappa = 0.311$ ,  $m = 1.02$ ) rather than values changing sinusoidally in time (Figure 1). Performance metrics are the Coefficient of Determination ( $R^2$ ), root-mean-square error (RMSE), and mean bias.

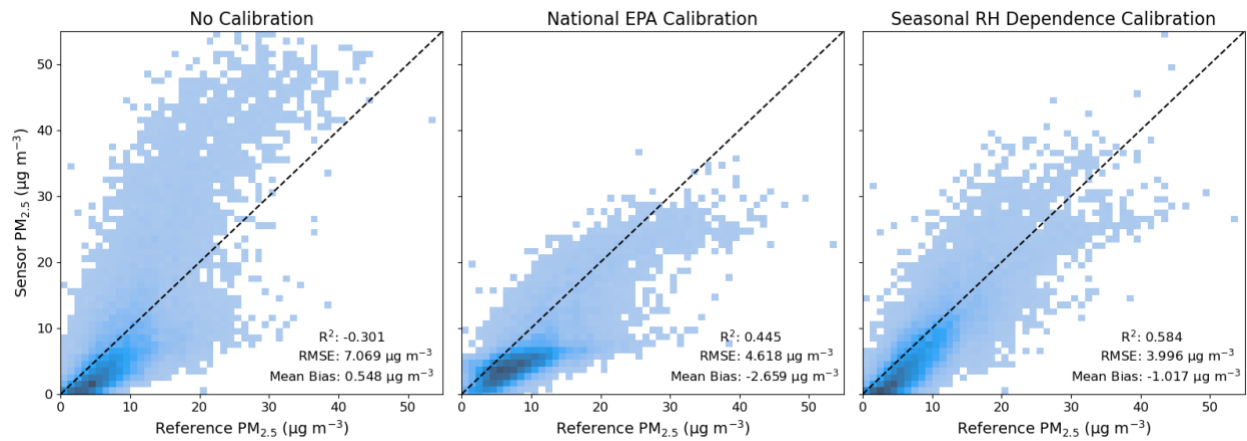

**Figure S4.** Reproduction of Figure 4 with bad air quality days (Aug 20 – Sep 16, 2021) removed. Sensor predicted  $\text{PM}_{2.5}$  values versus EPA reference values for Laney site from 2021–2022 with different correction algorithms. Performance metrics are the Coefficient of Determination ( $R^2$ ), root-mean-square error (RMSE), and mean bias.

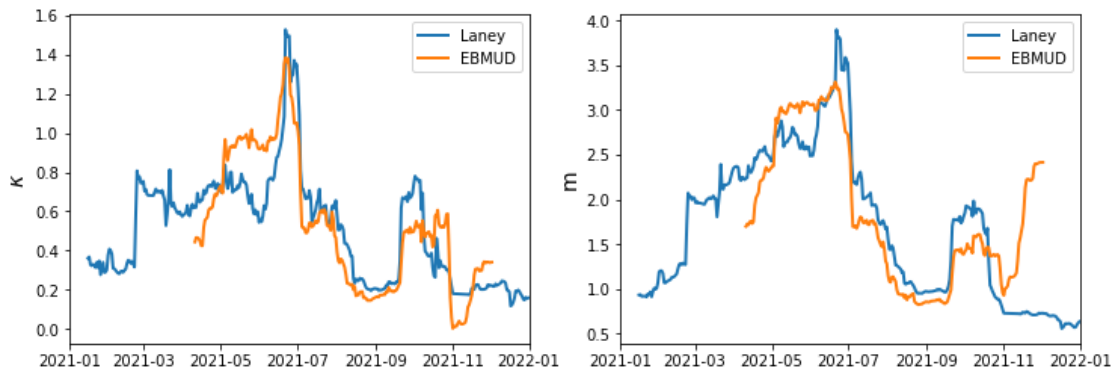

**Figure S5.** Calculated calibration parameters for two co-location sites in the Bay Area, CA: Laney and EBMUD (Table 1).

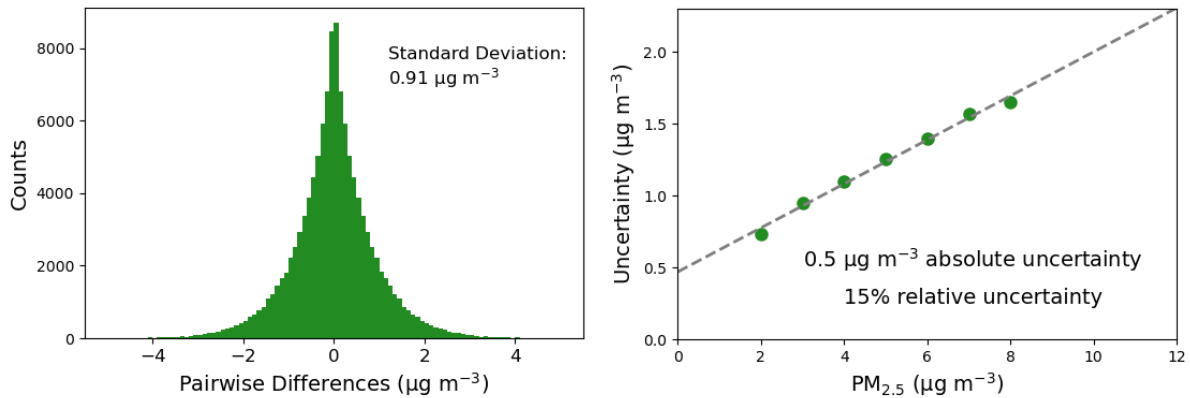

**Figure S6.** Pairwise differences of 17 Plantowers from two different manufacturer batches from 2 months of co-location in lab show that instrument noise is about  $1 \mu\text{g m}^{-3}$ , similar to the manufacturer's reported uncertainty. Analysis by size bin shows that the uncertainty is an absolute uncertainty of about  $0.5 \mu\text{g m}^{-3}$  with an added relative uncertainty of about 15%.

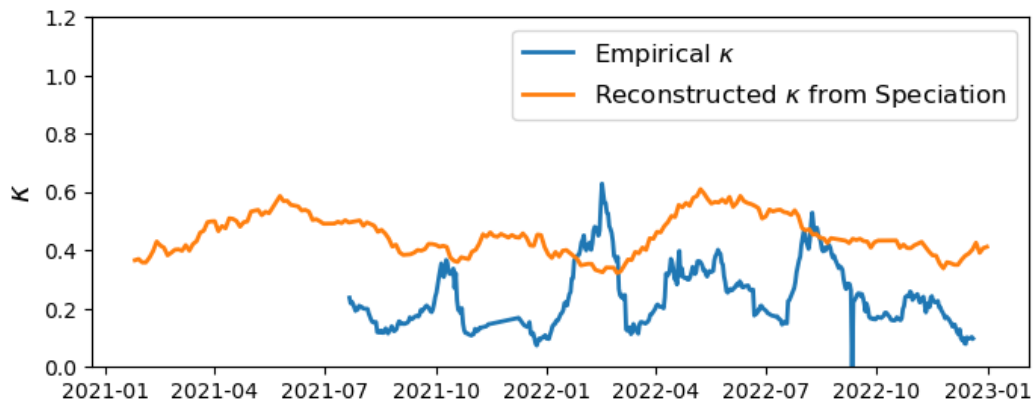

**Figure S7.** Empirically calculated  $\kappa$  for the Los Angeles site (Table 1), as shown in Figure 6a, alongside  $\kappa$  reconstructed from particle speciation data, displayed as a 4-week rolling average. An organic matter/organic carbon ratio of 1.6 was used to assign the organic matter fraction of the particle.

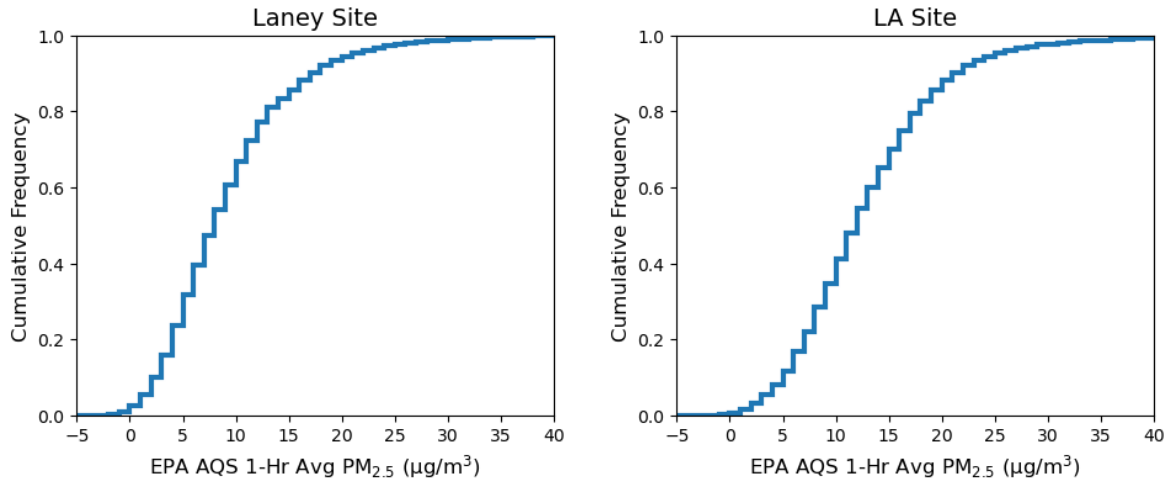

**Figure S8.** Cumulative frequency distributions for EPA AQS measurements at the Laney and LA EPA reference sites (Table 1).
